# Supplementary material for: Interfacial Fe5C2-Cu catalysts toward low-pressure syngas conversion to long-chain alcohols
Source: PubMed Central journal article supplement (PMC6941981; doi:10.1038/s41467-019-13691-4), 2020-01-03
Supplement: 41467_2019_13691_MOESM1_ESM.pdf [file 41467_2019_13691_MOESM1_ESM.pdf]

Supplementary Information for

**Interfacial Fe<sub>5</sub>C<sub>2</sub>-Cu catalysts toward Low-Pressure Syngas  
Conversion to Long-Chain Alcohols**

Li et al.

## Supplementary Figures and Tables

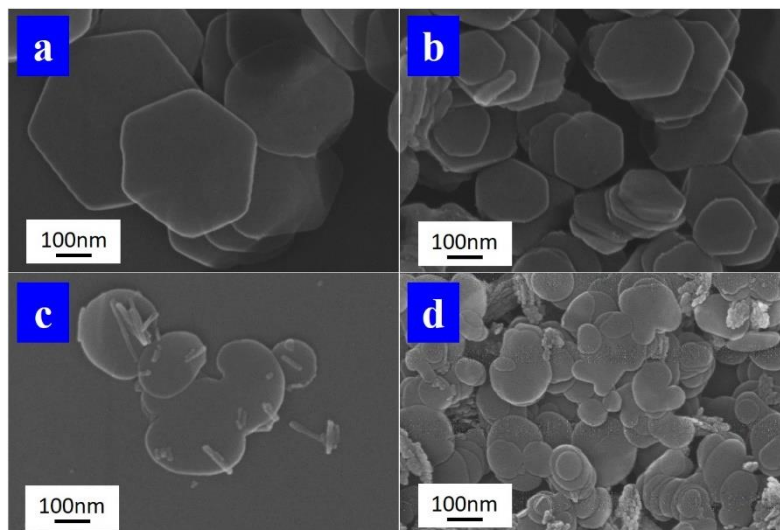

**Supplementary Figure 1.** Morphology of  $\text{Cu}_x\text{Fe}_y\text{Mg}_4\text{-LDH}$ . SEM images of (a)  $\text{Cu}_1\text{Fe}_1\text{Mg}_4\text{-LDH}$ , (b)  $\text{Cu}_2\text{Fe}_1\text{Mg}_4\text{-LDH}$ , (c)  $\text{Cu}_4\text{Fe}_1\text{Mg}_4\text{-LDH}$  and (d)  $\text{Cu}_6\text{Fe}_1\text{Mg}_4\text{-LDH}$ .

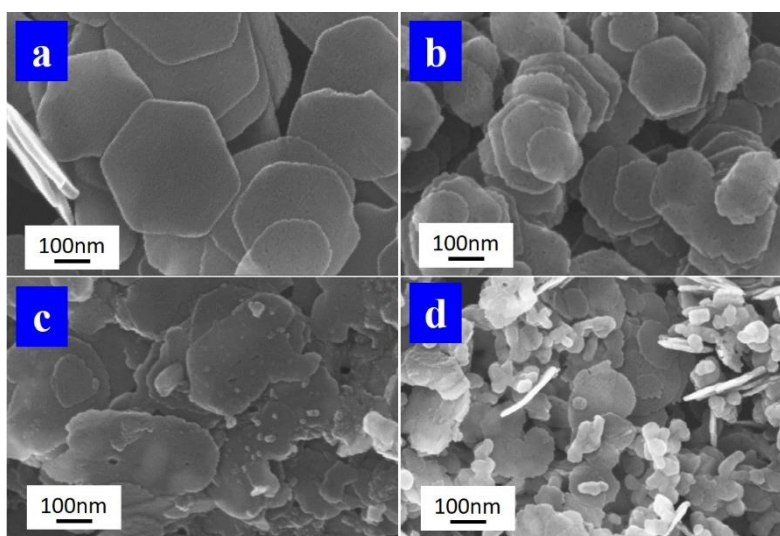

**Supplementary Figure 2.** Morphology of  $\text{Cu}_x\text{Fe}_y\text{Mg}_4\text{-MMO}$ . SEM images of Calcined sample: (a)  $\text{Cu}_1\text{Fe}_1\text{Mg}_4\text{-MMO}$ , (b)  $\text{Cu}_2\text{Fe}_1\text{Mg}_4\text{-MMO}$ , (c)  $\text{Cu}_4\text{Fe}_1\text{Mg}_4\text{-MMO}$  and (d)  $\text{Cu}_6\text{Fe}_1\text{Mg}_4\text{-MMO}$ .

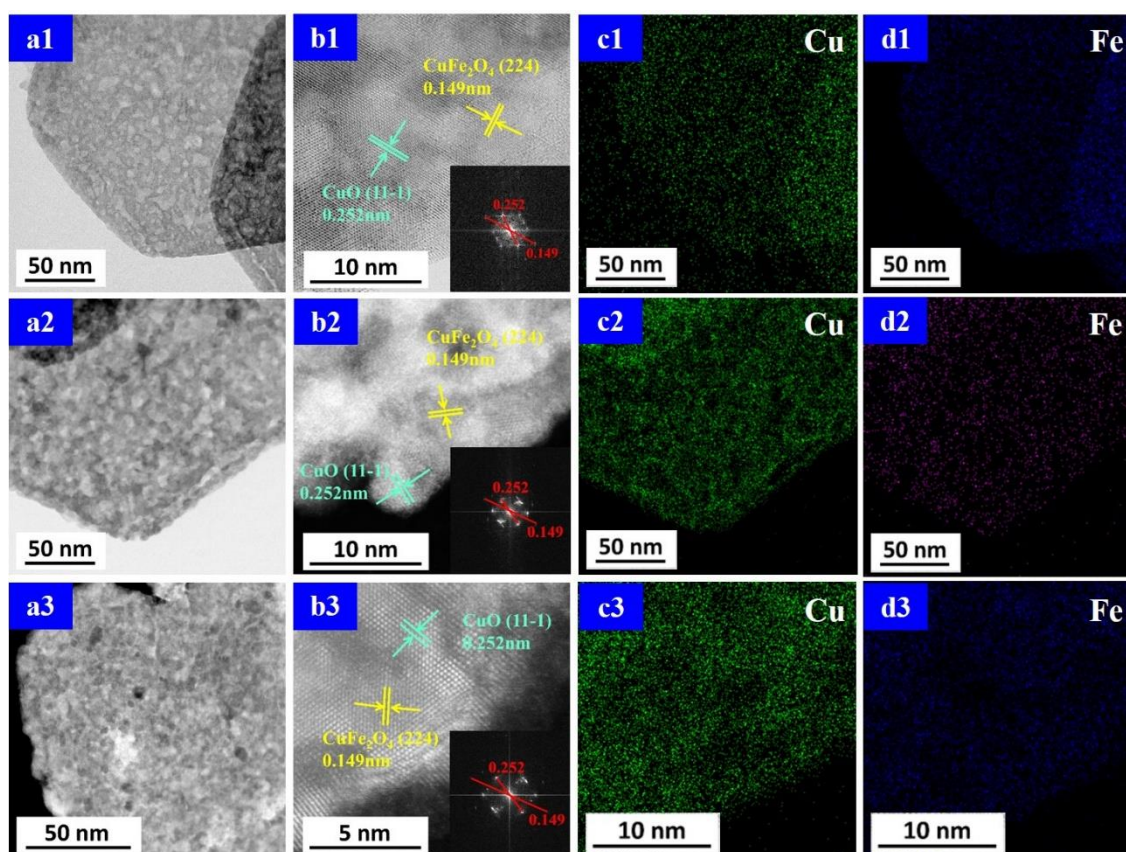

**Supplementary Figure 3.** Morphology of  $\text{Cu}_x\text{Fe}_y\text{Mg}_4\text{-MMO}$ . TEM images of Calcined sample: (a1–a3)  $\text{Cu}_1\text{Fe}_1\text{Mg}_4\text{-MMO}$ ,  $\text{Cu}_2\text{Fe}_1\text{Mg}_4\text{-MMO}$  and  $\text{Cu}_4\text{Fe}_1\text{Mg}_4\text{-MMO}$ . (b1–b3) HRTEM images selected from (a1–a3) and their Fourier transform patterns of the selected region (inset), respectively. (c1–c3) and (d1–d3) EDS mapping of elemental distribution for Cu and Fe.

**Supplementary Table 1.** Physicochemical properties of various catalysts

| Sample                   | BET surface area ( $\text{m}^2 \text{g}^{-1}$ ) | Surface C content (%) | Cu/Fe ratio <sup>a</sup> | Cu/Fe ratio <sup>b</sup> | Cu Crystallite size <sup>c</sup> (nm) | Mean Cu particle size <sup>d</sup> (nm) |
|--------------------------|-------------------------------------------------|-----------------------|--------------------------|--------------------------|---------------------------------------|-----------------------------------------|
| $\text{Cu}_1\text{Fe}_1$ | 32.49                                           | 33.53                 | 0.63                     | 0.99                     | 15.7                                  | 13.4                                    |
| $\text{Cu}_2\text{Fe}_1$ | 22.07                                           | 36.39                 | 1.24                     | 1.96                     | 18.4                                  | 17.9                                    |
| $\text{Cu}_4\text{Fe}_1$ | 15.96                                           | 35.43                 | 2.37                     | 3.84                     | 21.7                                  | 21.0                                    |
| $\text{Cu}_6\text{Fe}_1$ | 10.38                                           | 29.99                 | 4.47                     | 5.67                     | 25.1                                  | -                                       |

<sup>a</sup> Cu/Fe ratio was determined by XPS.

<sup>b</sup> Cu/Fe ratio was determined by inductively coupled plasma-atomic emission spectroscopy (ICP-AES).

<sup>c</sup> Crystallite size was determined by XRD with the Scherrer equation.

<sup>d</sup> Mean Cu particle size was determined by TEM images.

**Supplementary Table 2.** Catalytic performances of samples with various calcination temperatures

| Catalysts <sup>a,b,c</sup>                                | Conv. [%] | Selectivity[mol%] |                   |      |                 | Alcohols distribution[%] <sup>d</sup> |           |           |          |                    |
|-----------------------------------------------------------|-----------|-------------------|-------------------|------|-----------------|---------------------------------------|-----------|-----------|----------|--------------------|
|                                                           |           | CH <sub>4</sub>   | C <sub>2+</sub> H | ROH  | CO <sub>2</sub> | MeOH                                  | EtOH      | PrOH      | BuOH     | C <sub>5+</sub> OH |
| Cu <sub>4</sub> Fe <sub>1</sub> Mg <sub>4</sub> -MMO(800) | 17.3      | 11.3              | 44.7              | 5.2  | 38.8            | 21.3(1.1)                             | 59.2(3.1) | 12.0(0.6) | 5.7(0.3) | 1.8(0.1)           |
| Cu <sub>4</sub> Fe <sub>1</sub> Mg <sub>4</sub> -MMO(500) | 48.7      | 2.8               | 48.0              | 15.6 | 33.6            | 6.0(0.9)                              | 31.7(4.9) | 5.8(0.9)  | 2.5(0.4) | 54.0(8.5)          |
| Cu <sub>4</sub> Fe <sub>1</sub> Mg <sub>4</sub> -MMO(400) | 43.2      | 4.3               | 47.8              | 19.0 | 28.9            | 10.9(2.1)                             | 43.5(8.3) | 10.6(2.0) | 5.2(1.0) | 30.8(5.6)          |
| Cu <sub>4</sub> Fe <sub>1</sub> Mg <sub>4</sub> -MMO(350) | 44.9      | 3.1               | 43.4              | 18.8 | 34.7            | 5.9(1.0)                              | 49.8(9.3) | 9.2(1.7)  | 4.3(0.8) | 31.8(6.0)          |
| Cu <sub>4</sub> Fe <sub>1</sub> Mg <sub>4</sub> -LDH      | 42.1      | 9.8               | 50.3              | 18.7 | 21.2            | 26.6(4.9)                             | 45.3(8.4) | 14.1(2.6) | 6.2(1.2) | 7.8(1.6)           |

<sup>a</sup> Activation conditions: 1 g precursor, H<sub>2</sub>: CO: CO<sub>2</sub>=1: 1: 2 (40 mL min<sup>-1</sup>), 2 °C min<sup>-1</sup>, 300 °C 2 h + 350 °C 1 h.

<sup>b</sup> Reaction conditions: 3 MPa, 260 °C, H<sub>2</sub>/CO=2, 2400 mL g<sub>cat</sub><sup>-1</sup> h<sup>-1</sup>.

<sup>c</sup> Various calcination temperatures of Cu<sub>4</sub>Fe<sub>1</sub>Mg<sub>4</sub>-LDH in brackets.

<sup>d</sup> Normalized data to S<sub>ROH</sub>, mol% in brackets.

**Supplementary Table 3.** Catalytic performances of samples with various activation steps

| Entry <sup>a,b</sup>                                                                               | Conv. [%] | Selectivity[mol%] |                   |      |                 | Alcohols distribution[%] <sup>c</sup> |           |          |          |                    |
|----------------------------------------------------------------------------------------------------|-----------|-------------------|-------------------|------|-----------------|---------------------------------------|-----------|----------|----------|--------------------|
|                                                                                                    |           | CH <sub>4</sub>   | C <sub>2+</sub> H | ROH  | CO <sub>2</sub> | MeOH                                  | EtOH      | PrOH     | BuOH     | C <sub>5+</sub> OH |
| 500°C 20h                                                                                          | 4.8       | 5.6               | 41.8              | 45.2 | 7.4             | 85.4(38.6)                            | 1.9(0.8)  | 1.5(0.7) | 0.8(0.4) | 10.4(4.7)          |
| 350°C 2h                                                                                           | 33.1      | 1.7               | 64.2              | 7.2  | 26.9            | 8.4(0.6)                              | 18.4(1.3) | 7.2(0.5) | 1.3(0.1) | 64.7(4.7)          |
| 350°C 10h (H <sub>2</sub> :CO:CO <sub>2</sub> :N <sub>2</sub> =1:1:2:8, 100 ml min <sup>-1</sup> ) | 12.8      | 2.3               | 63.9              | 13.2 | 20.6            | 20.8(2.7)                             | 25.3(3.3) | 5.4(0.7) | 1.2(0.2) | 47.3(6.3)          |
| 300°C 2h + 350°C 1h                                                                                | 48.7      | 2.8               | 48.0              | 15.6 | 33.6            | 6.0(0.9)                              | 31.7(4.9) | 5.8(0.9) | 2.5(0.4) | 54.0(8.5)          |

<sup>a</sup> Activation conditions : Cu<sub>4</sub>Fe<sub>1</sub>Mg<sub>4</sub>-MMO, 1 g precursor, H<sub>2</sub>:CO:CO<sub>2</sub>=1:1:2 (40 ml min<sup>-1</sup>), 2 °C min<sup>-1</sup>.

<sup>b</sup> Reaction conditions: 3 MPa, 260 °C, H<sub>2</sub>/CO=2, 2400 mL g<sub>cat</sub><sup>-1</sup> h<sup>-1</sup>.

<sup>c</sup> Normalized data to S<sub>ROH</sub>, mol% in brackets.

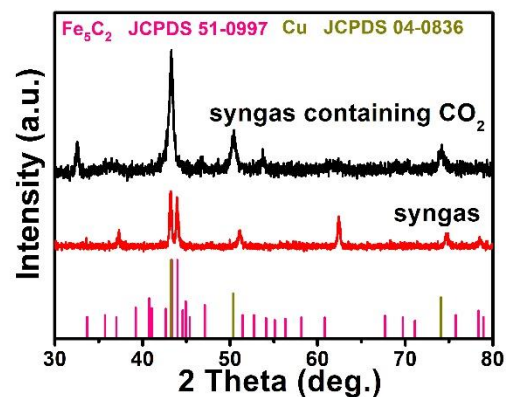**Supplementary Figure 4.** XRD patterns of the reduced and passivated samples in syngas or syngas containing CO<sub>2</sub> of Cu<sub>4</sub>Fe<sub>1</sub>Mg<sub>4</sub>-MMO.

**Supplementary Table 4.** Catalytic performances of samples with various activation atmosphere

| Activation atmosphere <sup>a,b</sup> | Pressure [MPa] | Conv. [%] | Selectivity[mol%] |                   |      |                 | Alcohols distribution[%] <sup>c</sup> |           |           |           |                    |
|--------------------------------------|----------------|-----------|-------------------|-------------------|------|-----------------|---------------------------------------|-----------|-----------|-----------|--------------------|
|                                      |                |           | CH <sub>4</sub>   | C <sub>2+</sub> H | ROH  | CO <sub>2</sub> | MeOH                                  | EtOH      | PrOH      | BuOH      | C <sub>5+</sub> OH |
| 50.0% CO <sub>2</sub>                | 1              | 53.2      | 3.7               | 36.5              | 29.8 | 30.0            | 8.7(2.6)                              | 28.8(8.5) | 8.2(2.4)  | 5.2(1.5)  | 49.1(14.8)         |
|                                      | 2              | 39.9      | 2.8               | 60.3              | 17.9 | 19.4            | 10.4(1.8)                             | 41.7(7.4) | 9.9(1.7)  | 9.1(1.6)  | 28.9(5.4)          |
|                                      | 3              | 48.7      | 2.8               | 48.0              | 15.6 | 33.6            | 6.0(0.9)                              | 31.7(4.9) | 5.8(0.9)  | 2.5(0.4)  | 54.0(8.5)          |
| Pure syngas                          | 1              | 39.3      | 7.6               | 46.6              | 20.7 | 25.1            | 21.6(4.4)                             | 45.1(9.3) | 14.2(2.9) | 7.3(1.5)  | 11.8(2.6)          |
|                                      | 2              | 39.7      | 7.8               | 44.8              | 23.0 | 24.4            | 19.2(4.4)                             | 43.1(9.9) | 13.4(3.1) | 10.2(2.3) | 14.1(3.3)          |
|                                      | 3              | 48.9      | 7.8               | 48.7              | 19.2 | 24.3            | 15.0(2.9)                             | 36.5(7.0) | 10.0(1.9) | 5.2(1.0)  | 33.3(6.4)          |

<sup>a</sup> Activation conditions: Cu<sub>4</sub>Fe<sub>1</sub>Mg<sub>4</sub>-MMO, 1 g precursor, 40 mL min<sup>-1</sup>, 2 °C min<sup>-1</sup>, 300 °C 2 h + 350 °C 1 h.

<sup>b</sup> Reaction conditions: 260 °C, H<sub>2</sub>/CO=2, 2400 mL g<sub>cat</sub><sup>-1</sup> h<sup>-1</sup>.

<sup>c</sup> Normalized data to S<sub>ROH</sub>, mol% in brackets.

**Supplementary Table 5.** Catalytic performances of samples with various H<sub>2</sub>/CO ratios in reaction gas

| H <sub>2</sub> /CO ratio <sup>a,b</sup> | Conv. [%] | Selectivity[mol%] |                   |      |                 | Alcohols distribution[%] <sup>c</sup> |           |           |           |                    |
|-----------------------------------------|-----------|-------------------|-------------------|------|-----------------|---------------------------------------|-----------|-----------|-----------|--------------------|
|                                         |           | CH <sub>4</sub>   | C <sub>2+</sub> H | ROH  | CO <sub>2</sub> | MeOH                                  | EtOH      | PrOH      | BuOH      | C <sub>5+</sub> OH |
| 1/1                                     | 26.5      | 4.8               | 34.8              | 12.6 | 47.8            | 12.4(1.6)                             | 38.3(4.8) | 11.2(1.4) | 11.4(1.4) | 26.7(3.4)          |
| 2/1                                     | 48.7      | 2.8               | 48.0              | 15.6 | 33.6            | 6.0(0.9)                              | 31.7(4.9) | 5.8(0.9)  | 2.5(0.4)  | 54.0(8.5)          |

<sup>a</sup> Activation conditions: Cu<sub>4</sub>Fe<sub>1</sub>Mg<sub>4</sub>-MMO, 1 g precursor, H<sub>2</sub>: CO: CO<sub>2</sub>=1: 1: 2 (40 mL min<sup>-1</sup>), 2 °C min<sup>-1</sup>, 300 °C 2 h + 350 °C 1 h.

<sup>b</sup> Reaction conditions: 3 MPa, 260 °C, 2400 mL g<sub>cat</sub><sup>-1</sup> h<sup>-1</sup>.

<sup>c</sup> Normalized data to S<sub>ROH</sub>, mol% in brackets.

**Supplementary Table 6.** Catalytic performances of samples with various reaction temperatures

| Reaction temperature <sup>a,b</sup> | Conv. [%] | Selectivity[mol%] |                   |      |                 | Alcohols distribution[%] <sup>c</sup> |           |           |          |                    |
|-------------------------------------|-----------|-------------------|-------------------|------|-----------------|---------------------------------------|-----------|-----------|----------|--------------------|
|                                     |           | CH <sub>4</sub>   | C <sub>2+</sub> H | ROH  | CO <sub>2</sub> | MeOH                                  | EtOH      | PrOH      | BuOH     | C <sub>5+</sub> OH |
| 220                                 | 4.6       | 4.7               | 39.9              | 53.8 | 1.6             | 12.2(6.6)                             | 16.1(8.7) | 10.7(5.7) | 5.4(2.9) | 55.6(29.9)         |
| 260                                 | 48.7      | 2.8               | 48.0              | 15.6 | 33.6            | 6.0(0.9)                              | 31.7(4.9) | 5.8(0.9)  | 2.5(0.4) | 54.0(8.5)          |
| 300                                 | 55.4      | 7.4               | 57.3              | 13.7 | 21.6            | 80.3(11.0)                            | 5.0(0.7)  | 3.6(0.5)  | 1.7(0.2) | 9.4(1.3)           |

<sup>a</sup> Activation conditions: Cu<sub>4</sub>Fe<sub>1</sub>Mg<sub>4</sub>-MMO, 1 g precursor, H<sub>2</sub>: CO: CO<sub>2</sub>=1: 1: 2 (40 mL min<sup>-1</sup>), 2 °C min<sup>-1</sup>, 300 °C 2 h + 350 °C 1 h.

<sup>b</sup> Reaction conditions: 3 MPa, H<sub>2</sub>/CO=2, 2400 mL g<sub>cat</sub><sup>-1</sup> h<sup>-1</sup>.

<sup>c</sup> Normalized data to S<sub>ROH</sub>, mol% in brackets.

**Supplementary Table 7.** Catalytic performances of samples with various reaction pressure

| Catalysts <sup>a,b</sup>        | Pressure [MPa] | Conv. [%] | Selectivity[mol%] |                   |                  |                 | Alcohols distribution [%] <sup>d</sup> |            |            |            |                    |
|---------------------------------|----------------|-----------|-------------------|-------------------|------------------|-----------------|----------------------------------------|------------|------------|------------|--------------------|
|                                 |                |           | CH <sub>4</sub>   | C <sub>2</sub> +H | ROH <sup>c</sup> | CO <sub>2</sub> | MeOH                                   | EtOH       | PrOH       | BuOH       | C <sub>5</sub> +OH |
| Cu <sub>1</sub> Fe <sub>1</sub> | 1              | 28.1      | 6.7               | 50.8              | 25.4 (30.6)      | 17.1            | 19.0 (4.8)                             | 38.5 (9.8) | 15.1 (3.8) | 7.3 (1.8)  | 20.1 (5.2)         |
|                                 | 2              | 33.5      | 3.8               | 59.1              | 21.8 (25.7)      | 15.3            | 12.8 (2.8)                             | 44.1 (9.6) | 14.2 (3.1) | 7.5 (1.6)  | 21.4 (4.7)         |
|                                 | 3              | 58.2      | 3.3               | 52.3              | 12.9 (18.8)      | 31.5            | 6.8 (0.9)                              | 47.6 (6.1) | 10.1 (1.3) | 4.6 (0.6)  | 30.9 (4.0)         |
| Cu <sub>2</sub> Fe <sub>1</sub> | 1              | 28.8      | 2.1               | 44.8              | 23.6 (33.5)      | 29.5            | 10.9 (2.6)                             | 31.0 (7.3) | 13.4 (3.2) | 8.8 (2.1)  | 35.9 (8.4)         |
|                                 | 2              | 32.1      | 5.8               | 48.4              | 23.0 (29.7)      | 22.7            | 20.6 (4.7)                             | 20.8 (4.8) | 12.4 (2.8) | 7.5 (1.7)  | 38.7 (9.0)         |
|                                 | 3              | 38.4      | 2.4               | 60.9              | 16.8 (21.0)      | 19.9            | 21.4 (3.6)                             | 21.6 (3.6) | 9.3 (0.9)  | 5.3 (0.4)  | 43.4 (7.3)         |
| Cu <sub>4</sub> Fe <sub>1</sub> | 1              | 53.2      | 3.7               | 36.5              | 29.8 (42.6)      | 30.0            | 8.7 (2.6)                              | 28.8 (8.5) | 8.2 (2.4)  | 5.2 (1.5)  | 49.1 (14.8)        |
|                                 | 1 <sup>e</sup> | 31.6      | 8.4               | 47.3              | 20.2 (26.6)      | 24.1            | 15.1 (3.1)                             | 22.5 (4.5) | 13.2 (2.6) | 10.6 (2.1) | 38.6 (7.9)         |
|                                 | 2              | 39.9      | 2.8               | 60.3              | 17.9 (22.2)      | 19.4            | 10.4 (1.8)                             | 41.7 (7.4) | 9.9 (1.7)  | 9.1 (1.6)  | 28.9 (5.4)         |
|                                 | 3              | 48.7      | 2.8               | 48.0              | 15.6 (23.5)      | 33.6            | 6.0 (0.9)                              | 31.7 (4.9) | 5.8 (0.9)  | 2.5 (0.4)  | 54.0 (8.5)         |
| Cu <sub>6</sub> Fe <sub>1</sub> | 1              | 17.2      | 5.7               | 43.6              | 7.1 (12.6)       | 43.6            | 4.1(0.3)                               | 14.7(1.0)  | 3.9(0.3)   | 2.1(0.1)   | 75.2(5.4)          |
|                                 | 1 <sup>f</sup> | 30.5      | 6.4               | 46.3              | 3.2 (5.7)        | 44.1            | 10.1 (0.3)                             | 15.5 (0.5) | 9.2 (0.3)  | 5.6 (0.2)  | 59.6 (1.9)         |
|                                 | 2              | 27.5      | 3.1               | 45.2              | 9.8 (16.8)       | 41.9            | 9.1(0.9)                               | 19.8(1.9)  | 6.8(0.6)   | 3.5(0.3)   | 60.8(6.1)          |
|                                 | 3              | 61.5      | 10.7              | 38.0              | 8.9 (15.4)       | 42.4            | 9.7(0.9)                               | 29.6(2.6)  | 8.2(0.7)   | 4.2(0.3)   | 48.3(4.4)          |

<sup>a</sup> Activation conditions: 1 g precursor, H<sub>2</sub>: CO: CO<sub>2</sub>=1: 1: 2 (40 mL min<sup>-1</sup>), 2 °C min<sup>-1</sup>, 300 °C 2 h + 350 °C 1 h.

<sup>b</sup> Reaction conditions : 260 °C, H<sub>2</sub>/CO=2, 2400 mL g<sub>cat</sub><sup>-1</sup> h<sup>-1</sup>.

<sup>c</sup> S<sub>ROH</sub> excluding CO<sub>2</sub> in brackets.

<sup>d</sup> Normalized data to S<sub>ROH</sub>, mol% in brackets.

<sup>e</sup> WHSV = 4800 mL g<sub>cat</sub><sup>-1</sup> h<sup>-1</sup>

<sup>f</sup> WHSV = 1200 mL g<sub>cat</sub><sup>-1</sup> h<sup>-1</sup>



**Supplementary Table 8.** Space time yield of various products calculated from Table S7

| Catalysts                       | Pressure [MPa] | Space time yield [ $\text{g g}_{\text{cat}}^{-1} \text{h}^{-1}$ ] |                   |                 |       |       |                    |
|---------------------------------|----------------|-------------------------------------------------------------------|-------------------|-----------------|-------|-------|--------------------|
|                                 |                | CH <sub>4</sub>                                                   | C <sub>2+</sub> H | CO <sub>2</sub> | ROH   | MeOH  | C <sub>5+</sub> OH |
| Cu <sub>1</sub> Fe <sub>1</sub> | 1              | 0.017                                                             | 0.116             | 0.122           | 0.130 | 0.025 | 0.026              |
|                                 | 2              | 0.012                                                             | 0.166             | 0.135           | 0.141 | 0.018 | 0.030              |
|                                 | 3              | 0.018                                                             | 0.254             | 0.481           | 0.141 | 0.010 | 0.040              |
| Cu <sub>2</sub> Fe <sub>1</sub> | 1              | 0.006                                                             | 0.106             | 0.218           | 0.111 | 0.014 | 0.042              |
|                                 | 2              | 0.014                                                             | 0.109             | 0.159           | 0.122 | 0.024 | 0.045              |
|                                 | 3              | 0.009                                                             | 0.200             | 0.205           | 0.131 | 0.027 | 0.053              |
| Cu <sub>4</sub> Fe <sub>1</sub> | 1              | 0.012                                                             | 0.111             | 0.285           | 0.201 | 0.018 | 0.101              |
|                                 | 2              | 0.010                                                             | 0.205             | 0.207           | 0.140 | 0.014 | 0.040              |
|                                 | 3              | 0.014                                                             | 0.210             | 0.462           | 0.141 | 0.009 | 0.076              |

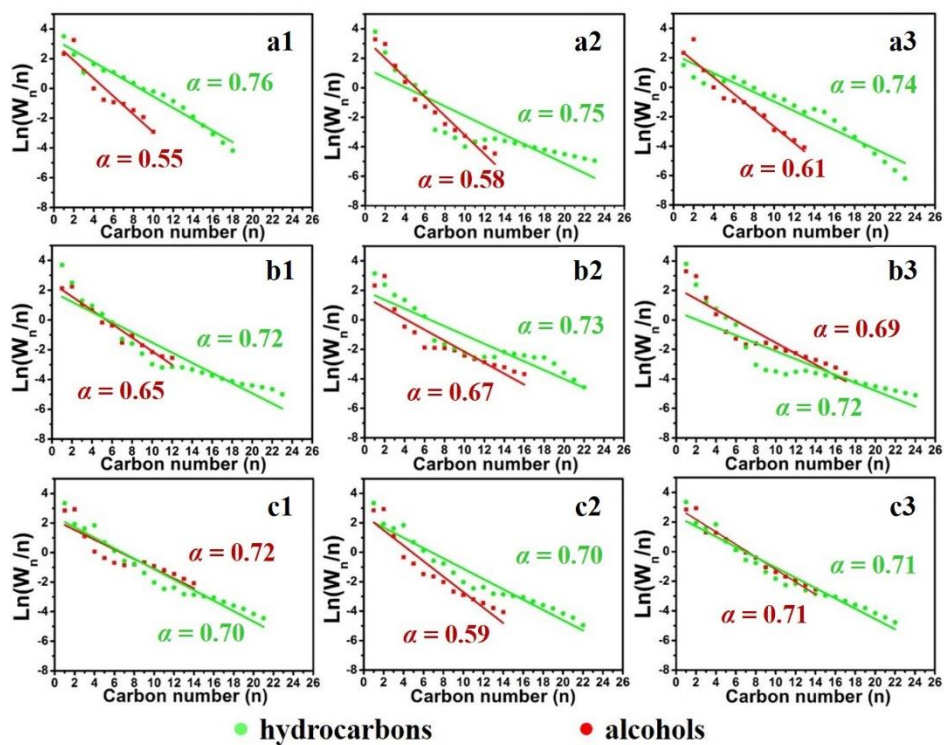

**Supplementary Figure 5.** Anderson-Schulz-Flory (A-S-F) plots for the distribution of alcohols and hydrocarbons. (a)  $\text{Cu}_1\text{Fe}_1$ , (b)  $\text{Cu}_2\text{Fe}_1$  and (c)  $\text{Cu}_4\text{Fe}_1$ . (a1–c1) at 1 MPa, (a2–c2) at 2 MPa, (a3–c3) at 3 MPa.

**Supplementary Table 9.** Catalytic performance data for a variety of modified F–T catalysts used in LAS

| Catalyst                                               | H <sub>2</sub> /CO ratio | Temperature /°C | Pressure /MPa | GHSV                                                     | CO conversion/% | Total alcohol Selectivity/% | Long-chain alcohol selectivity/% | Total alcohols STY <sup>a</sup> | Long-chain alcohols STY <sup>a</sup> | reference                                                   |
|--------------------------------------------------------|--------------------------|-----------------|---------------|----------------------------------------------------------|-----------------|-----------------------------|----------------------------------|---------------------------------|--------------------------------------|-------------------------------------------------------------|
| Cu <sub>4</sub> Fe <sub>1</sub>                        | 2                        | 260             | 1             | 2400 mL g <sub>cat</sub> <sup>-1</sup> h <sup>-1</sup>   | 53.2            | 29.8                        | 49.1                             | 0.201                           | 0.101                                | This work                                                   |
| CuZnFeMn                                               | 2                        | 260             | 4             | 6000 h <sup>-1</sup>                                     | 52.62           | 31.04                       | 3.65                             | 0.24                            | 0.016                                | <i>Catal. Commun.</i> <b>2008</b> , 9, 1869-1873            |
| 3DOM Cu <sub>2</sub> Fe <sub>1</sub>                   | 1                        | 260             | 4.8           | 2000 h <sup>-1</sup>                                     | 57.5            | 33.6                        | 52.4                             | 0.20                            | 0.100                                | <i>ChemCatChem</i> <b>2014</b> , 6, 473-478                 |
| CF <sub>0.5</sub>                                      | 2                        | 260             | 4             | 5000 h <sup>-1</sup>                                     | 17.99           | 20.77                       | 2.5                              | 0.05                            | 0.001                                | <i>J. Colloid Interface Sci.</i> <b>2016</b> , 470, 162-171 |
| CNF-2-0.005                                            | 1.5                      | 240             | 5             | 32000 mL g <sub>cat</sub> <sup>-1</sup> h <sup>-1</sup>  | 11              | 39                          |                                  | 0.53                            |                                      | <i>ACS Catal.</i> <b>2018</b> , 8, 9604-9618                |
| CuFe NPs                                               | 2                        | 220             | 6             | 6000 h <sup>-1</sup>                                     | 17.1            | 21.9                        | 64                               | 0.14                            | 0.085                                | <i>J. Mol. Catal. A: Chem.</i> <b>2013</b> , 378, 319-325   |
| 0.5%K-FeCuMnZnO                                        | 2                        | 260             | 4             | 6000 h <sup>-1</sup>                                     | 27.3            | 49.3                        | 3                                | 0.29                            |                                      | <i>Appl. Energy</i> <b>2015</b> , 138, 584-589              |
| CoGa-ZnAl-LDO/ Al <sub>2</sub> O <sub>3</sub>          | 2                        | 260             | 3             | 2000 h <sup>-1</sup>                                     | 43.5            | 59                          | 37.7                             | 0.24                            | 0.091                                | <i>J. Catal.</i> <b>2016</b> , 340, 236-247                 |
| CoMn   CuZnAlZr                                        | 2                        | 230             | 6             | 2000 mL g <sub>cat</sub> <sup>-1</sup> h <sup>-1</sup>   | 17.8            | 46.1                        | 57.1                             | 0.04                            | 0.023                                | <i>Angew. Chem., Int. Ed.</i> <b>2019</b> , 58, 4627-4631   |
| CoCu/MoO <sub>x</sub>                                  | 1                        | 270             | 4             | 120000 mL g <sub>cat</sub> <sup>-1</sup> h <sup>-1</sup> | <2              | 46                          |                                  | 0.03                            |                                      | <i>Angew. Chem., Int. Ed.</i> <b>2014</b> , 53, 6397-6401   |
| (Cu <sub>1</sub> Co <sub>2</sub> ) <sub>2</sub> Al/CNT | 2                        | 230             | 3             | 3900 mL g <sub>cat</sub> <sup>-1</sup> h <sup>-1</sup>   | 45              | 62                          | 13.8                             | 0.34                            | 0.05                                 | <i>J. Mater. Sci.</i> <b>2016</b> , 51, 5216-5231           |
| CuFeCo                                                 | 2                        | 350             | 5.5           | 6000 h <sup>-1</sup>                                     | 72              | 12.5                        | 6                                | 0.25                            | 0.015                                | <i>Appl. Catal. A</i> <b>2015</b> , 503, 51-61              |

|                                                                                       |      |     |   |                                                        |       |       |       |       |       |                                                            |
|---------------------------------------------------------------------------------------|------|-----|---|--------------------------------------------------------|-------|-------|-------|-------|-------|------------------------------------------------------------|
| <b>Fe/K/ Mo<sub>2</sub>C(Fe/Mo= 1/14)</b>                                             | 2    | 320 | 7 | 4000 h <sup>-1</sup>                                   | 50.25 | 22.69 | 0.62  | 0.14  | 0.001 | <i>Catal. Lett.</i><br><b>2010</b> , 136, 9-13             |
| <b>S2-CuFeMg-Cat</b>                                                                  | 2    | 300 | 4 | 2000 h <sup>-1</sup>                                   | 56.89 | 49.07 | 11.25 | 0.28  | 0.032 | <i>Catal. Sci. Technol.</i> <b>2013</b> , 3, 1324-1332     |
| <b>CuFeK0.5M</b>                                                                      | 2    | 320 | 5 | 6000 h <sup>-1</sup>                                   | 53    | 61    |       | 0.32  |       | <i>Fuel Process. Technol.</i> <b>2017</b> , 159, 436-441   |
| <b>Fe-CuMnZrO<sub>2</sub>(I)</b>                                                      | 2    | 310 | 8 | 8000 h <sup>-1</sup>                                   | 45.5  | 26.2  | 3     | 0.45  | 0.014 | <i>J. Mol. Catal. A: Chem.</i><br><b>2004</b> , 221, 51-58 |
| <b>Fe-Cu/Al<sub>2</sub>O<sub>3</sub> (Al<sub>2</sub>O<sub>3</sub> loading: 89.3%)</b> | 2.68 | 380 | 4 | 10000 h <sup>-1</sup>                                  |       | 62.3  |       | 0.044 |       | <i>J. Nat. Gas Chem.</i> <b>2008</b> , 17, 327-331         |
| <b>Cu-Fe-K-M<sub>80</sub></b>                                                         | 2    | 320 | 5 | 6000 h <sup>-1</sup>                                   | 56    | 63    |       | 0.35  |       | <i>Energy Procedia</i><br><b>2015</b> , 75, 767-772        |
| <b>Cu<sub>20</sub>Fe<sub>30</sub>K<sub>1</sub>M</b>                                   | 2    | 320 | 5 | 6000 h <sup>-1</sup>                                   | 46    | 53    |       | 0.35  |       | <i>Catal. Today</i><br><b>2014</b> , 234, 278-284          |
| <b>K-CoMoS<sub>2</sub>/Al<sub>2</sub>O<sub>3</sub></b>                                | 2    | 300 | 5 | 5000 h <sup>-1</sup>                                   | 9     | 47    | 47    | 0.30  | 0.141 | <i>Energy Fuels</i><br><b>2013</b> , 277, 3769-3777        |
| <b>Co<sub>4</sub>Mn<sub>1</sub>K<sub>0.1</sub></b>                                    | 5    | 220 | 4 | 3600 h <sup>-1</sup>                                   | 34    | 44    | 22    | 0.20  | 0.044 | <i>Nat Commun.</i><br><b>2016</b> , 7, 13058-13064         |
| <b>CoCuMn</b>                                                                         | 2    | 200 | 6 | 3600 h <sup>-1</sup>                                   | 3     | 52    | 65    | 0.12  | 0.078 | <i>J. Am. Chem. Soc.</i> <b>2013</b> , 135, 7114-7117      |
| <b>Co<sub>1</sub>Mo<sub>1</sub>K<sub>0.05-12%</sub> (4.2% Co/MWCNT)</b>               | 2    | 290 | 5 | 8000 mL g <sub>cat</sub> <sup>-1</sup> h <sup>-1</sup> | 21.1  | 85    |       | 0.33  |       | <i>Appl. Catal. A</i><br><b>2008</b> , 340, 87-97          |

<sup>a</sup> g g<sub>cat</sub><sup>-1</sup> h<sup>-1</sup>

**Supplementary Table 10.** Catalytic performances of Cu<sub>4</sub>Fe<sub>1</sub> with three runs

| Entry <sup>a,b</sup> | Conv. [%] | Selectivity[mol%] |                   |      |                 | Alcohols distribution[%] <sup>c</sup> |           |          |          |                    |
|----------------------|-----------|-------------------|-------------------|------|-----------------|---------------------------------------|-----------|----------|----------|--------------------|
|                      |           | CH <sub>4</sub>   | C <sub>2+</sub> H | ROH  | CO <sub>2</sub> | MeOH                                  | EtOH      | PrOH     | BuOH     | C <sub>5+</sub> OH |
| 1                    | 53.2      | 3.7               | 36.5              | 29.8 | 30.0            | 8.7(2.6)                              | 28.8(8.5) | 8.2(2.4) | 5.2(1.5) | 49.1(14.8)         |
| 2                    | 50.1      | 3.4               | 34.3              | 31.2 | 30.1            | 9.6(3.0)                              | 29.6(9.2) | 8.7(2.7) | 6.4(1.9) | 45.7(14.4)         |
| 3                    | 51.2      | 2.3               | 38.6              | 28.0 | 31.1            | 7.5(2.1)                              | 28.0(7.8) | 8.1(2.3) | 6.0(1.7) | 50.4(14.1)         |

<sup>a</sup> Activation conditions: 1 g precursor, H<sub>2</sub>: CO: CO<sub>2</sub>=1: 1: 2 (40 mL min<sup>-1</sup>), 2 °C min<sup>-1</sup>, 300 °C 2 h + 350 °C 1 h.

<sup>b</sup> Reaction conditions: 1 MPa, 260 °C, H<sub>2</sub>/CO=2, 2400 mL g<sub>cat</sub><sup>-1</sup> h<sup>-1</sup>.

<sup>c</sup> Normalized data to S<sub>ROH</sub>, mol% in brackets.

**Supplementary Table 11.** Catalytic performances of samples with different preparation methods and composition

| Catalysts <sup>a,b</sup>                      | Conv. [%] | Selectivity[mol%] |                   |      |                 | Alcohols distribution[%] <sup>c</sup> |            |          |          |                    |
|-----------------------------------------------|-----------|-------------------|-------------------|------|-----------------|---------------------------------------|------------|----------|----------|--------------------|
|                                               |           | CH <sub>4</sub>   | C <sub>2+</sub> H | ROH  | CO <sub>2</sub> | MeOH                                  | EtOH       | PrOH     | BuOH     | C <sub>5+</sub> OH |
| Cu <sub>4</sub> Fe <sub>1</sub>               | 53.2      | 3.7               | 36.5              | 29.8 | 30.0            | 8.7(2.6)                              | 28.8(8.5)  | 8.2(2.4) | 5.2(1.5) | 49.1(14.8)         |
| Cu <sub>4</sub> Fe <sub>1-co</sub>            | 37.1      | 13.4              | 31.3              | 35.2 | 20.1            | 9.6(3.4)                              | 79.6(28.0) | 6.7(2.3) | 2.4(0.8) | 1.7(0.7)           |
| Cu <sub>4</sub> Fe <sub>1-im</sub>            | 9.7       | 19.9              | 52.0              | 10.5 | 17.6            | 81.2(8.5)                             | 9.6(1.0)   | 5.3(0.6) | 3.9(0.4) | –                  |
| Cu <sub>4</sub>                               | 5.9       | 23.1              | 2.1               | 70.5 | 4.3             | 92.0(64.8)                            | 3.9(2.7)   | 2.7(1.9) | 1.4(1.1) | –                  |
| Fe <sub>1</sub>                               | 19.2      | 21.3              | 38.6              | –    | 40.1            | –                                     | –          | –        | –        | –                  |
| Cu <sub>4</sub> /Fe <sub>1</sub> <sup>d</sup> | 7.8       | 25.5              | 21.7              | 27.6 | 25.2            | 85.6(23.6)                            | 8.8(2.4)   | 5.6(1.6) | –        | –                  |
| Cu <sub>4</sub> +Fe <sub>1</sub> <sup>e</sup> | 6.2       | 21.7              | 47.8              | 15.0 | 15.5            | 89.1(13.3)                            | 7.3(1.1)   | 3.6(0.6) | –        | –                  |
| Fe <sub>1</sub> +Cu <sub>4</sub> <sup>f</sup> | 6.5       | 27.3              | 34.3              | 19.6 | 18.8            | 90.6(17.7)                            | 7.6(1.5)   | 1.8(0.4) | –        | –                  |

<sup>a</sup> Activation conditions: 1 g precursor, H<sub>2</sub>: CO: CO<sub>2</sub>=1: 1: 2 (40 mL min<sup>-1</sup>), 2 °C min<sup>-1</sup>, 300 °C 2 h + 350 °C 1 h.

<sup>b</sup> Reaction conditions: 1 MPa, 260 °C, H<sub>2</sub>/CO=2, 2400 mL g<sub>cat</sub><sup>-1</sup> h<sup>-1</sup>.

<sup>c</sup> Normalized data to S<sub>ROH</sub>, mol% in brackets.

<sup>d</sup> Physical mixture of Cu<sub>4</sub> and Fe<sub>1</sub>

<sup>e</sup> Fe<sub>1</sub> is located separately below Cu<sub>4</sub> by an inert layer of quartz wool.

<sup>f</sup> Cu<sub>4</sub> is located separately below Fe<sub>1</sub> by an inert layer of quartz wool.

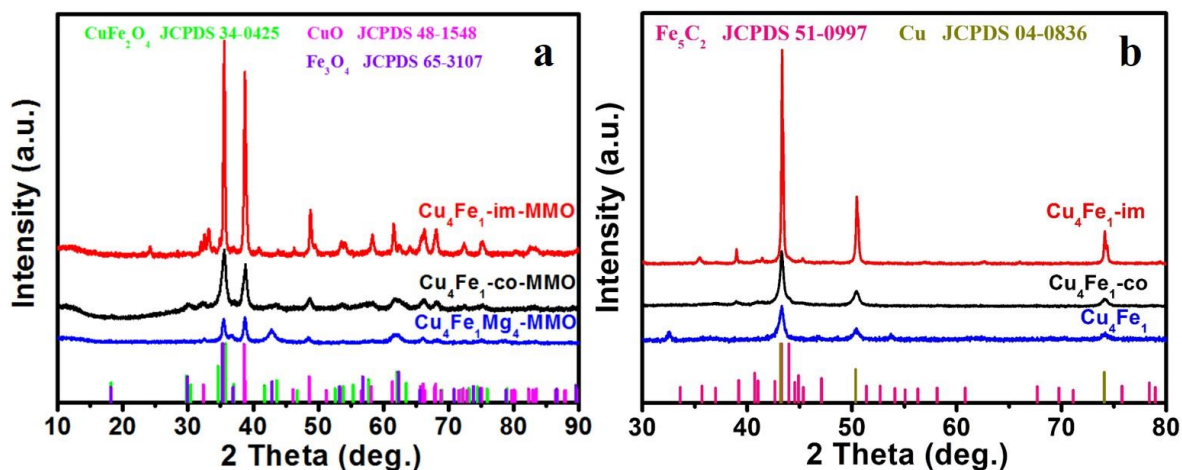

**Supplementary Figure 6.** Structure of control samples. XRD patterns of the calcined samples (a)  $\text{Cu}_4\text{Fe}_1\text{-im-MMO}$ ,  $\text{Cu}_4\text{Fe}_1\text{-co-MMO}$ ,  $\text{Cu}_4\text{Fe}_1\text{Mg}_4\text{-MMO}$  and the reduced samples (b)  $\text{Cu}_4\text{Fe}_1\text{-im}$ ,  $\text{Cu}_4\text{Fe}_1\text{-co}$ ,  $\text{Cu}_4\text{Fe}_1$ .

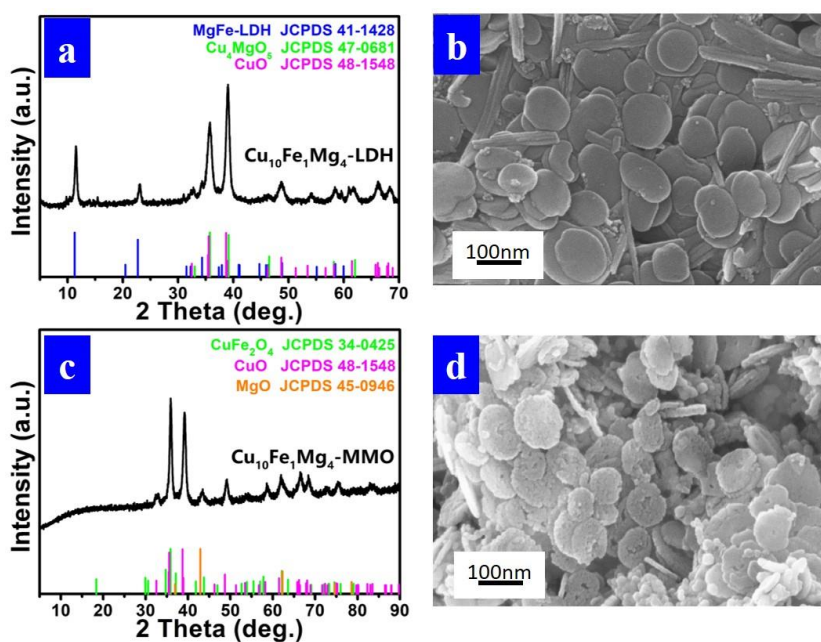

**Supplementary Figure 7.** Structure and morphology of  $\text{Cu}_{10}\text{Fe}_1\text{Mg}_4\text{-LDH}$ . XRD patterns of (a)  $\text{Cu}_{10}\text{Fe}_1\text{Mg}_4\text{-LDH}$  precursors and calcined (c)  $\text{Cu}_{10}\text{Fe}_1\text{Mg}_4\text{-MMO}$  precursors. SEM images: (b)  $\text{Cu}_{10}\text{Fe}_1\text{Mg}_4\text{-LDH}$  and (d)  $\text{Cu}_{10}\text{Fe}_1\text{Mg}_4\text{-MMO}$ .

**Supplementary Table 12.** Catalytic performances of samples with Cu/Fe ratio 10/1

| Catalysts <sup>a,b</sup>         | Pressure [MPa] | Conv. [%] | Selectivity[mol%] |                   |      |                 | Alcohols distribution[%] <sup>c</sup> |           |          |          |                    |
|----------------------------------|----------------|-----------|-------------------|-------------------|------|-----------------|---------------------------------------|-----------|----------|----------|--------------------|
|                                  |                |           | CH <sub>4</sub>   | C <sub>2+</sub> H | ROH  | CO <sub>2</sub> | MeOH                                  | EtOH      | PrOH     | BuOH     | C <sub>5+</sub> OH |
| Cu <sub>10</sub> Fe <sub>1</sub> | 1              | 17.4      | 9.7               | 41.1              | 5.4  | 43.8            | 11.1(0.6)                             | 21.2(1.1) | 6.3(0.3) | 3.2(0.2) | 58.2(3.2)          |
|                                  | 2              | 32.4      | 5.8               | 45.0              | 10.2 | 39.0            | 12.9(1.3)                             | 25.5(2.6) | 7.2(0.7) | 3.6(0.4) | 50.8(5.2)          |
|                                  | 3              | 61.2      | 15.2              | 26.9              | 10.1 | 47.8            | 11.1(1.1)                             | 24.0(2.4) | 7.4(0.7) | 4.1(0.4) | 53.4(5.5)          |

<sup>a</sup> Activation conditions: 1 g precursor, H<sub>2</sub>: CO: CO<sub>2</sub>=1: 1: 2 (40 mL min<sup>-1</sup>), 2 °C min<sup>-1</sup>, 300 °C 2 h + 350 °C 1 h.

<sup>b</sup> Reaction conditions: 260 °C, H<sub>2</sub>/CO=2, 2400 mL g<sub>cat</sub><sup>-1</sup> h<sup>-1</sup>.

<sup>c</sup> Normalized data to S<sub>ROH</sub>, mol% in brackets.



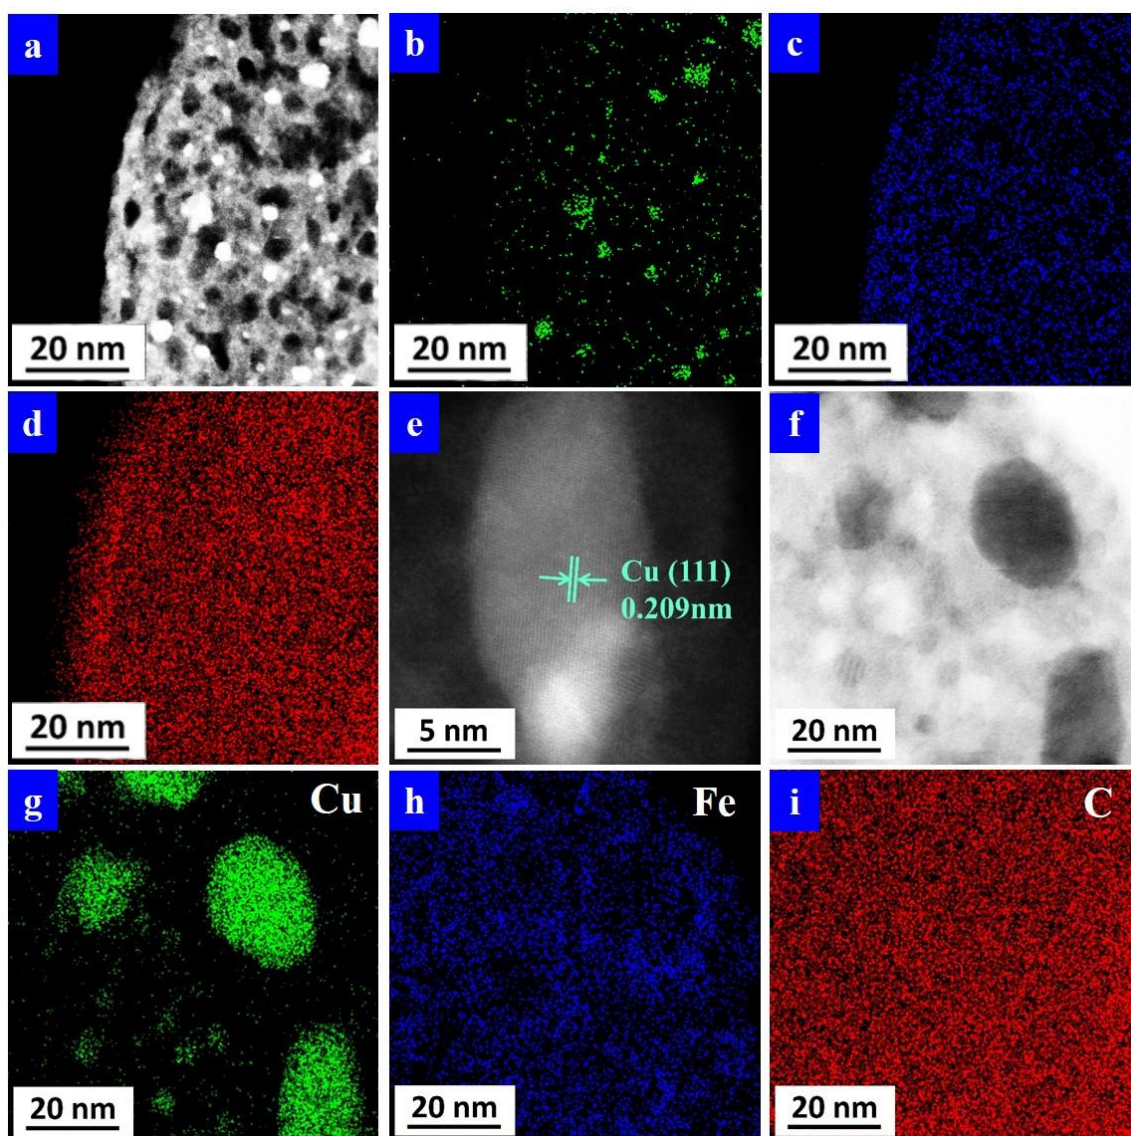

**Supplementary Figure 8.** Morphology of  $\text{Cu}_1\text{Fe}_1$  catalyst. (a, e and f) TEM images of  $\text{Cu}_1\text{Fe}_1$  catalyst (reduced and passivated). (b, c, d, g, h and i) EDS mapping of elemental distribution for Cu, Fe and C, respectively.

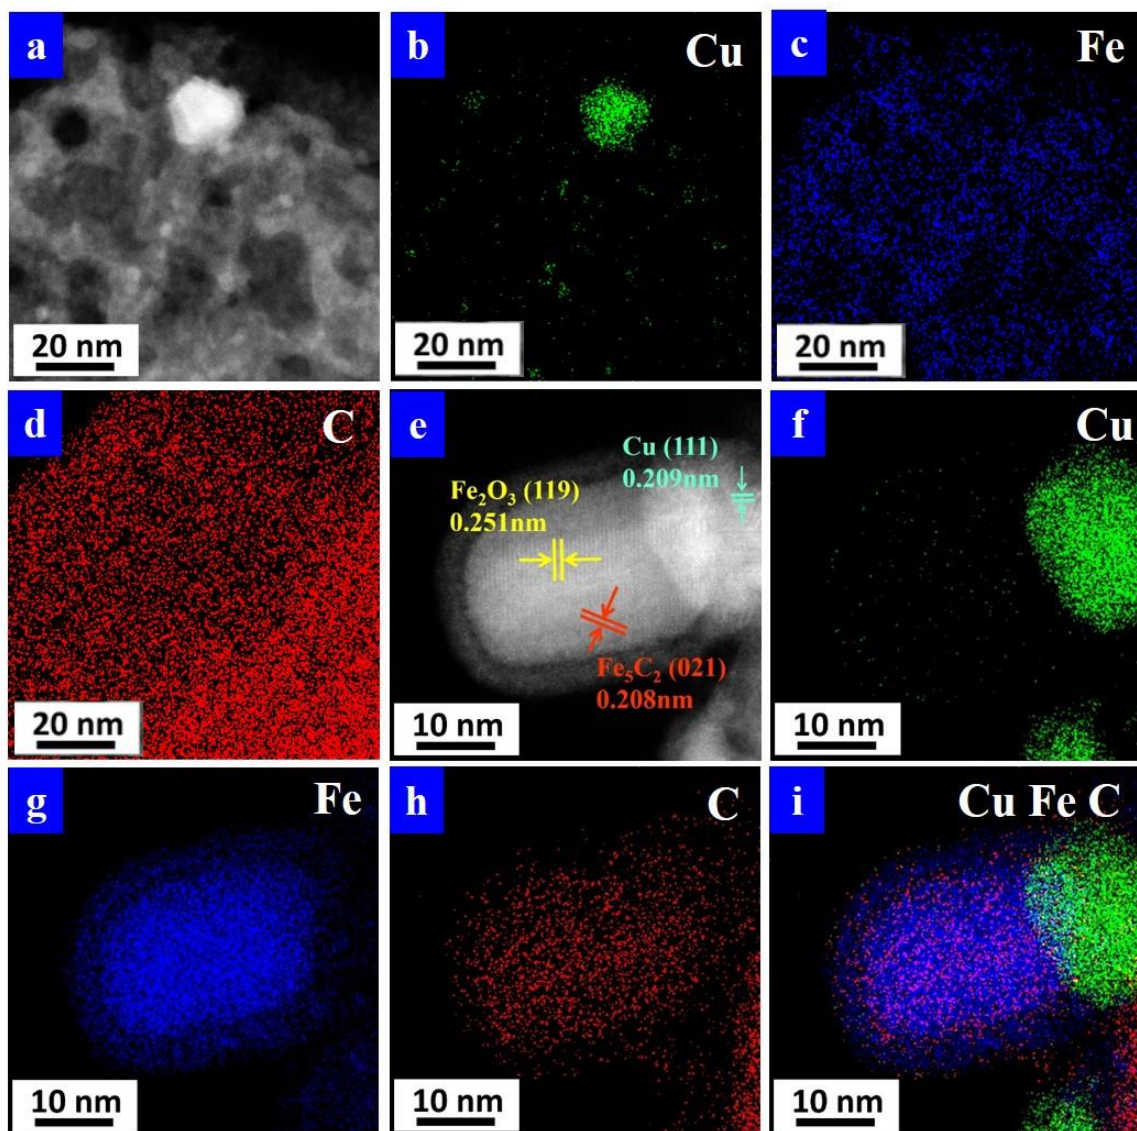

**Supplementary Figure 9.** Morphology of  $\text{Cu}_2\text{Fe}_1$  catalyst. (a, e) TEM images of  $\text{Cu}_2\text{Fe}_1$  catalyst (reduced and passivated). (b, c, d, f, g, h and i) EDS mapping of elemental distribution for Cu, Fe and C, respectively.

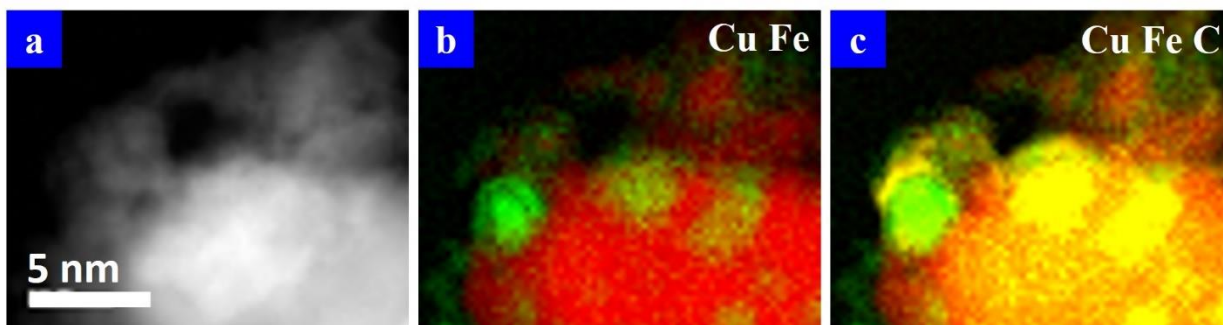

**Supplementary Figure 10.** Morphology of  $\text{Cu}_4\text{Fe}_1$  catalyst. (a) HAADF-STEM image and (b, c) corresponding EELS mapping of Cu (red), Fe (green) and C (yellow).

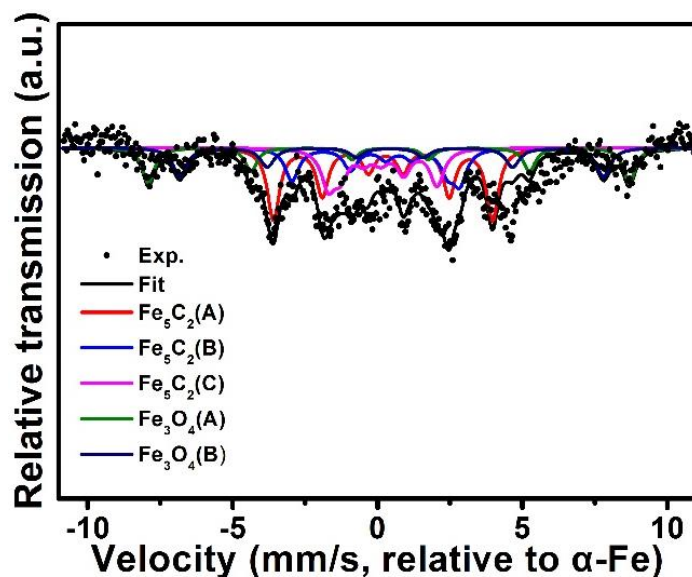

**Supplementary Figure 11.** Mössbauer spectrum of  $\text{Cu}_4\text{Fe}_1$  sample (reduced and passivated) (Exp.: experimental data; Fit: fitting data).

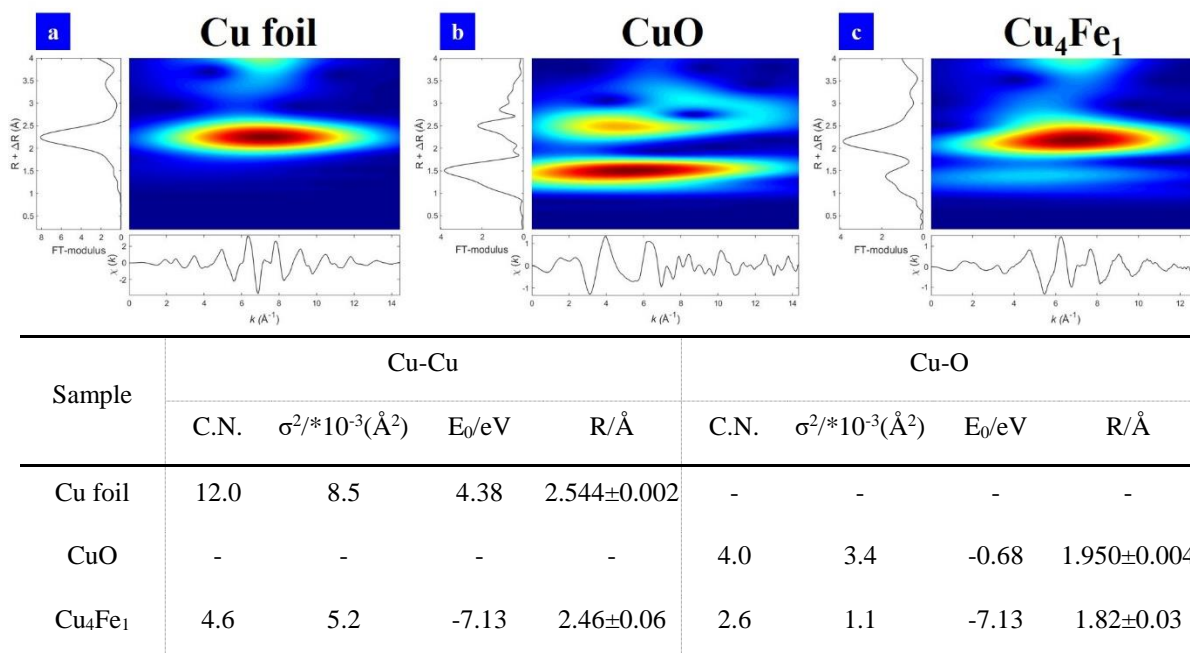

**Supplementary Figure 12.** Structure of  $\text{Cu}_1\text{Fe}_1$  catalyst. Wavelet transformation of (a) Cu foil, (b) CuO and (c)  $\text{Cu}_4\text{Fe}_1$ . The fitting results are listed in the table.

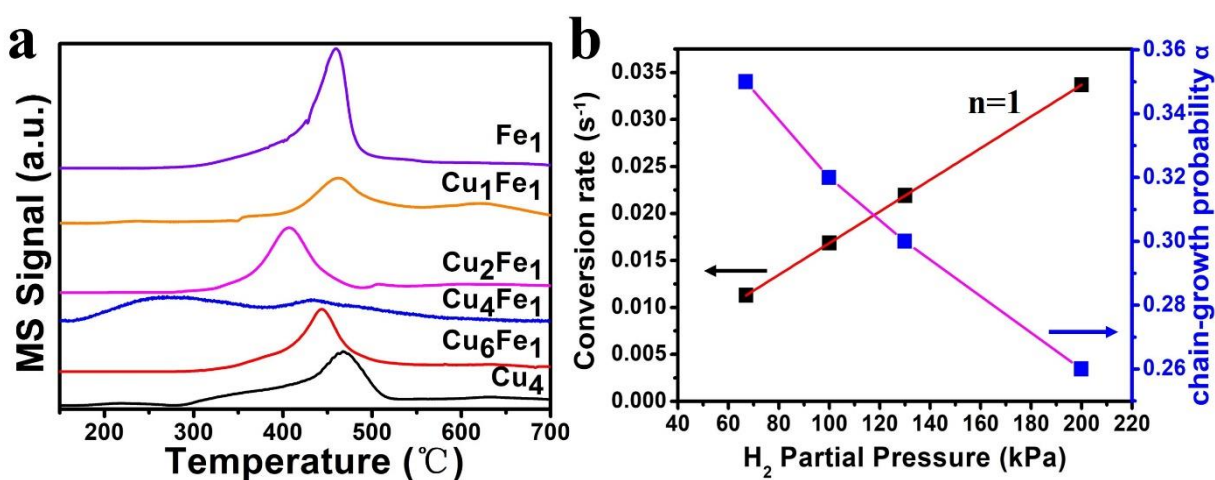

**Supplementary Figure 13.**  $\text{H}_2$  activation of  $\text{Fe}_1$ ,  $\text{Cu}_4$  and  $\text{Cu}_x\text{Fe}_y$  samples. (a)  $\text{H}_2$ -TPD profiles of  $\text{Fe}_1$ ,  $\text{Cu}_4$  and  $\text{Cu}_x\text{Fe}_y$  samples. (b) Kinetic orders of  $\text{H}_2$  and the corresponding chain-growth probability at various  $\text{H}_2$  partial pressures over  $\text{Cu}_4\text{Fe}_1$ .
